# Supplementary material
Source: ML conference proceedings conference paper supplement (https://openreview.net/forum?id=-TJpOACwpl5)
Supplement: supplementary_material [file attachment]

# Pre-survey:

Please answer the following questions about the labeling task you will be performing. There is no right/wrong answer here, and you should answer based on your personal experience.

**1. Do you think an AI algorithm or an average person (without help) will be better at determining the correct art period?**

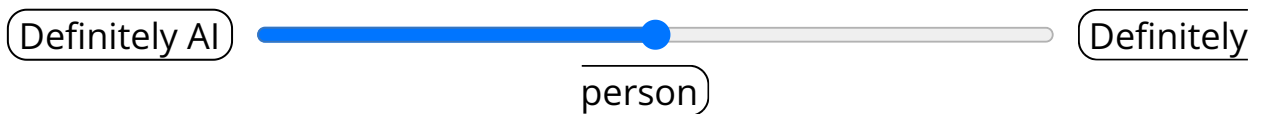

Continue
