# Supplementary material
Source: ML conference proceedings conference paper supplement (https://openreview.net/forum?id=-TJpOACwpl5)
Supplement: supplementary_material [file attachment]

# Instructions:

In this study, you will be labeling 32 different paintings / croppings of a painting based on what art period the painting is from. Do **NOT** lookup try to search for paintings from the art periods while completing this survey.

**Bonus payment is available!** You will be given an additional monetary reward of up to 30% the base payment based on how well you perform.

Follow the figures below for instructions.

Once you have finished reading, **click the "Continue" button at the bottom.**

The screenshot shows a survey interface with the title "Which art period is this painting from?". In the center is a painting of the Mona Lisa, labeled with a blue circle "1" and a red rounded rectangle. Below the painting is a slider bar, labeled with a blue circle "2". The slider has two endpoints: "Definitely Romanticism (~1780-1850)" on the left and "Definitely Renaissance (~1300-1600)" on the right. A vertical line in the middle is labeled "Unsure". A red arrow, labeled with a blue circle "3", points to a small square handle on the slider bar. At the bottom of the interface is an orange "SUBMIT" button.

**Step 1. (1)** You will see an image appear in the center of the screen. **(2)** A slider bar will appear below it. **(3)** Click a location on the slider bar, based on which art period you think the painting is from. The location you select should correspond

to your confidence in predicting the art period the painting is from. For example, we clicked a location close to "Definitely Renaissance (~1300-1600)" because this is the Mona Lisa, a painting from the Renaissance period. Once you have selected a location, click "SUBMIT".

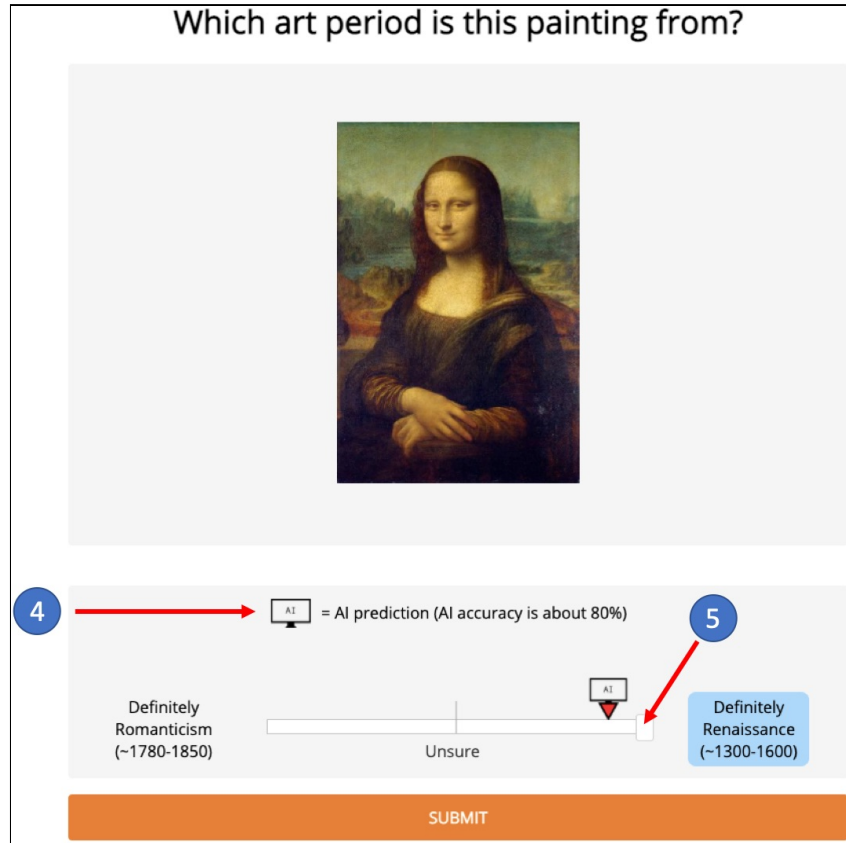

**Step 2.** After clicking "SUBMIT", a **(4)** computer icon will appear. This computer icon represents the prediction of an artificial intelligence (AI) algorithm on this same task; in this example, the AI thought the painting was from the Renaissance period. **(5)** As before, select a location on the slider bar using this new information. You must click on the slider before submitting, even if you want to keep your selection. Once you have selected a location, click "SUBMIT".

You will then be shown a new image. Repeat the process from **Steps 1 and 2** until there are no more images left to label. After labeling the images, you will have a brief survey to complete and you will be done.

Continue
