# Supplementary material
Source: ML conference proceedings conference paper supplement (https://openreview.net/forum?id=-TJpOACwpl5)
Supplement: supplementary_material [file attachment]

# Exit survey:

Please answer the following questions about the labeling task. There is no right/wrong answer here, and you should answer based on your personal experience.

**1. How accurate were the human labelers at determining the correct art period?**

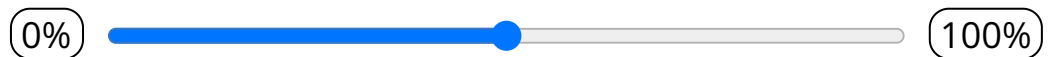

Continue
