# Supplementary material
Source: ML conference proceedings conference paper supplement (https://openreview.net/forum?id=-TJpOACwpl5)
Supplement: supplementary_material [file attachment]

## Instructions -- Bonus payment:

You will receive bonus pay based on your performance! We will compute your average accuracy to determine your bonus.

Simply put, if you put a high confidence and get the correct answer, you will get a larger bonus. But if you put a high confidence and get the answer wrong, your bonus is reduced. If you are unsure about an answer, **it is best for you to adjust the slider to reflect your confidence.**

Continue
