# Supplementary material
Source: ML conference proceedings conference paper supplement (https://openreview.net/forum?id=-TJpOACwpl5)
Supplement: supplementary_material [file attachment]

You received a bonus of: \$0.51

Please click the following link to complete the survey:

<https://app.prolific.co/submissions/complete?cc=9145FD8C>
