# Supplementary material
Source: ML conference proceedings conference paper supplement (https://openreview.net/forum?id=-TJpOACwpl5)
Supplement: supplementary_material [file attachment]

What is the average accuracy of the AI algorithm?\*

60% ☐

70% ☐

80% ☐

90% ☐

100% ☐

Continue
