# Supplementary material
Source: ML conference proceedings conference paper supplement (https://openreview.net/forum?id=-TJpOACwpl5)
Supplement: supplementary_material [file attachment]

# Exit survey:

Please answer the following questions about the labeling task. There is no right/wrong answer here, and you should answer based on your personal experience.

**5. How often do you use artificial intelligence (AI) systems to aid you in your everyday life and/or at work?**

Never  Very often

Continue
