# Supplementary material
Source: ML conference proceedings conference paper supplement (https://openreview.net/forum?id=-TJpOACwpl5)
Supplement: supplementary_material [file attachment]

# Instructions -- Advice from artificial intelligence (AI) model:

After labeling an image on your own, we will show you the output of an **AI** algorithm trained to identify the art period a painting was created in.

The **AI** has an average accuracy of around **80%**.

Continue
