# Supplementary material
Source: ML conference proceedings conference paper supplement (https://openreview.net/forum?id=-TJpOACwpl5)
Supplement: supplementary_material [file attachment]

Which art period is this painting from?

**You are finished labeling images.**

**Press the 'Enter'/'Return' key  
on your keyboard to continue.**

Definitely  
[ArtPeriod1]

Unsure

Definitely  
[ArtPeriod2]

SUBMIT
