# Supplementary material
Source: ML conference proceedings conference paper supplement (https://openreview.net/forum?id=-TJpOACwpl5)
Supplement: supplementary_material [file attachment]

## Example Survey

In this directory are a set of PDF documents showing what our survey looks like for the Art dataset. Each “page” corresponds to a separate web page. Filenames are numbered in the order a participant encounters them. Clicking “continue” / “submit” brings the participant to the next web page.

A brief description of the survey screenshots follows. Any content referring to the art data was substituted with appropriate content for the given task.

- **Page 1:** Participant enters a unique ID assigned to them through Prolific, the crowdsourcing platform we use to recruit participants.
- **Page 2:** Instructions specific to the task and advice source participants will receive. Note that this page is seen by participants as a single, continuous web page.
- **Page 3:** Additional information on the advice source.
- **Page 4:** Information on bonus payment.
- **Page 5:** Manipulation check. Participants who got the wrong answer were sent back to Page 2.
- **Page 6:** Pre-survey question to assess prior belief in AI advice
- **Page 7:** Example task: recording Response 1.
- **Page 8:** Example task: recording Response 2.
- **Page 9:** After completing all tasks, Participants are shown this screen.
- **Page 10-14:** The response on slide 12 is used for the belief prior.
- **Page 15:** Check for errors in survey.
- **Page 16:** Debrief slide.
- **Page 17:** Bonus payment and survey submission slide.
