# Supplementary material
Source: ML conference proceedings conference paper supplement (https://openreview.net/forum?id=-TJpOACwpl5)
Supplement: supplementary_material [file attachment]

Which art period is this painting from?

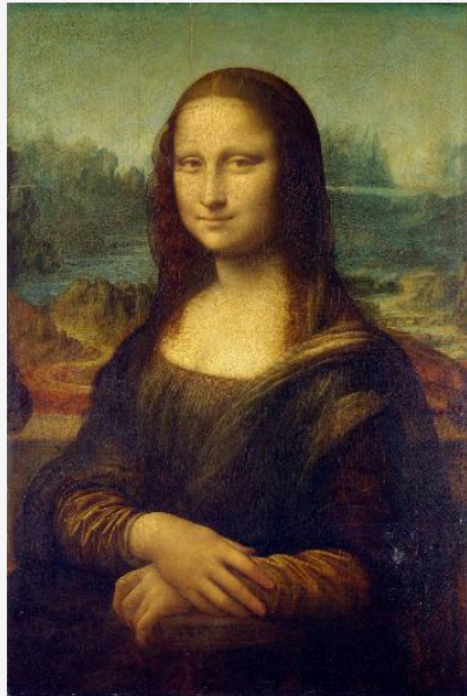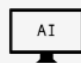

= AI prediction (AI accuracy is about 80%)

Definitely  
Romanticism  
(~1780-1850)

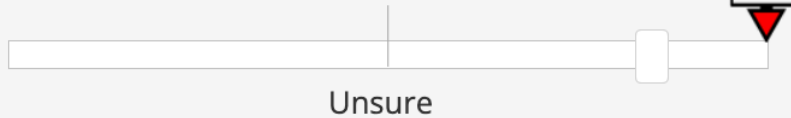

Definitely  
Renaissance  
(~1300-1600)

SUBMIT
